# Supplementary material for: An invasive legume increases perennial grass biomass: An indirect pathway for plant community change
Source: PLoS One. 2019 Jan 25;14(1):e0211295. doi: 10.1371/journal.pone.0211295 (PMC6347436; doi:10.1371/journal.pone.0211295)
Supplement: S1 Appendix — (CSV) [file pone.0211295.s001.csv]

Replicate	Rhizome	Invasive	Species	Biomass	Density
Control1	Rhizome absent	Invasive absent	AT	9.53	7
Control1	Rhizome absent	Invasive absent	AT	5.73	7
Control1	Rhizome absent	Invasive absent	AT	3.96	7
Control1	Rhizome absent	Invasive absent	AT	5.85	7
Control1	Rhizome absent	Invasive absent	CL	0.21	7
Control1	Rhizome absent	Invasive absent	CL	0.04	7
Control1	Rhizome absent	Invasive absent	MF	19.71	7
Control2	Rhizome absent	Invasive absent	AT	3.46	11
Control2	Rhizome absent	Invasive absent	AT	2.21	11
Control2	Rhizome absent	Invasive absent	AT	2.36	11
Control2	Rhizome absent	Invasive absent	AT	2.37	11
Control2	Rhizome absent	Invasive absent	CF	2.69	11
Control2	Rhizome absent	Invasive absent	CF	1.79	11
Control2	Rhizome absent	Invasive absent	CF	63.77	11
Control2	Rhizome absent	Invasive absent	CL	1.47	11
Control2	Rhizome absent	Invasive absent	MF	5.07	11
Control2	Rhizome absent	Invasive absent	MF	7.66	11
Control2	Rhizome absent	Invasive absent	MF	0.29	11
Control3	Rhizome absent	Invasive absent	AT	5.59	8
Control3	Rhizome absent	Invasive absent	AT	0.96	8
Control3	Rhizome absent	Invasive absent	AT	5.38	8
Control3	Rhizome absent	Invasive absent	CF	41.89	8
Control3	Rhizome absent	Invasive absent	CF	3.63	8
Control3	Rhizome absent	Invasive absent	CL	3.55	8
Control3	Rhizome absent	Invasive absent	CL	3.59	8
Control3	Rhizome absent	Invasive absent	CL	12.28	8
Control4	Rhizome absent	Invasive absent	AT	9.11	8
Control4	Rhizome absent	Invasive absent	AT	7.01	8
Control4	Rhizome absent	Invasive absent	AT	3.3	8
Control4	Rhizome absent	Invasive absent	CF	13.47	8
Control4	Rhizome absent	Invasive absent	CL	6.7	8
Control4	Rhizome absent	Invasive absent	CL	13.06	8
Control4	Rhizome absent	Invasive absent	MF	14.04	8
Control4	Rhizome absent	Invasive absent	MF	0.43	8
Control5	Rhizome absent	Invasive absent	AT	2.54	11
Control5	Rhizome absent	Invasive absent	AT	3.15	11
Control5	Rhizome absent	Invasive absent	AT	2.14	11
Control5	Rhizome absent	Invasive absent	AT	2.25	11
Control5	Rhizome absent	Invasive absent	CF	30.68	11
Control5	Rhizome absent	Invasive absent	CF	0.8	11
Control5	Rhizome absent	Invasive absent	CL	1.78	11
Control5	Rhizome absent	Invasive absent	MF	16.36	11
Control5	Rhizome absent	Invasive absent	MF	10.5	11
Control5	Rhizome absent	Invasive absent	MF	2.66	11
Control5	Rhizome absent	Invasive absent	MF	0.97	11
Control6	Rhizome absent	Invasive absent	AT	3.33	12
Control6	Rhizome absent	Invasive absent	AT	2.17	12
Control6	Rhizome absent	Invasive absent	AT	2.36	12
Control6	Rhizome absent	Invasive absent	AT	2.33	12
Control6	Rhizome absent	Invasive absent	CF	0.61	12
Control6	Rhizome absent	Invasive absent	CF	41.31	12
Control6	Rhizome absent	Invasive absent	CL	0.72	12
Control6	Rhizome absent	Invasive absent	CL	3.01	12
Control6	Rhizome absent	Invasive absent	CL	0.77	12
Control6	Rhizome absent	Invasive absent	MF	16.12	12
Control6	Rhizome absent	Invasive absent	MF	11.26	12
Control6	Rhizome absent	Invasive absent	MF	0.5	12
Invasive1	Rhizome absent	Invasive present	AT	9.02	9
Invasive1	Rhizome absent	Invasive present	AT	5.7	9
Invasive1	Rhizome absent	Invasive present	AT	7.39	9
Invasive1	Rhizome absent	Invasive present	CL	5.12	9
Invasive1	Rhizome absent	Invasive present	CL	2.8	9
Invasive1	Rhizome absent	Invasive present	CL	1.86	9
Invasive1	Rhizome absent	Invasive present	LC	4.13	9
Invasive1	Rhizome absent	Invasive present	MF	6.52	9
Invasive1	Rhizome absent	Invasive present	MF	10.57	9
Invasive2	Rhizome absent	Invasive present	AT	4.1	6
Invasive2	Rhizome absent	Invasive present	AT	8.02	6
Invasive2	Rhizome absent	Invasive present	CF	34.94	6
Invasive2	Rhizome absent	Invasive present	CF	5.73	6
Invasive2	Rhizome absent	Invasive present	LC	2.69	6
Invasive2	Rhizome absent	Invasive present	LC	3.55	6
Invasive3	Rhizome absent	Invasive present	AT	5.64	10
Invasive3	Rhizome absent	Invasive present	AT	7	10
Invasive3	Rhizome absent	Invasive present	AT	7.09	10
Invasive3	Rhizome absent	Invasive present	AT	2.47	10
Invasive3	Rhizome absent	Invasive present	CF	1.72	10
Invasive3	Rhizome absent	Invasive present	LC	1.45	10
Invasive3	Rhizome absent	Invasive present	LC	3.22	10
Invasive3	Rhizome absent	Invasive present	MF	9.76	10
Invasive3	Rhizome absent	Invasive present	MF	11.92	10
Invasive3	Rhizome absent	Invasive present	MF	0.2	10
Invasive4	Rhizome absent	Invasive present	AT	7.53	11
Invasive4	Rhizome absent	Invasive present	AT	3.21	11
Invasive4	Rhizome absent	Invasive present	AT	4.09	11
Invasive4	Rhizome absent	Invasive present	AT	3.26	11
Invasive4	Rhizome absent	Invasive present	CF	0.34	11
Invasive4	Rhizome absent	Invasive present	CL	8.88	11
Invasive4	Rhizome absent	Invasive present	LC	2.39	11
Invasive4	Rhizome absent	Invasive present	LC	4.37	11
Invasive4	Rhizome absent	Invasive present	LC	2.97	11
Invasive4	Rhizome absent	Invasive present	LC	0.74	11
Invasive4	Rhizome absent	Invasive present	MF	28.42	11
Rhizome1	Rhizome present	Invasive absent	AT	0.33	9
Rhizome1	Rhizome present	Invasive absent	AT	2.1	9
Rhizome1	Rhizome present	Invasive absent	AT	2.12	9
Rhizome1	Rhizome present	Invasive absent	AT	1.51	9
Rhizome1	Rhizome present	Invasive absent	CF	10.18	9
Rhizome1	Rhizome present	Invasive absent	CF	0.57	9
Rhizome1	Rhizome present	Invasive absent	CL	2.06	9
Rhizome1	Rhizome present	Invasive absent	CL	1.73	9
Rhizome1	Rhizome present	Invasive absent	GR	144.2	9
Rhizome1	Rhizome present	Invasive absent	MF	4.21	9
Rhizome2	Rhizome present	Invasive absent	AT	0.97	8
Rhizome2	Rhizome present	Invasive absent	AT	1.58	8
Rhizome2	Rhizome present	Invasive absent	AT	1.48	8
Rhizome2	Rhizome present	Invasive absent	AT	1.17	8
Rhizome2	Rhizome present	Invasive absent	AT	1.42	8
Rhizome2	Rhizome present	Invasive absent	CL	2.52	8
Rhizome2	Rhizome present	Invasive absent	CL	2.09	8
Rhizome2	Rhizome present	Invasive absent	GR	143.69	8
Rhizome2	Rhizome present	Invasive absent	MF	0.53	8
Rhizome3	Rhizome present	Invasive absent	AT	1.51	15
Rhizome3	Rhizome present	Invasive absent	AT	1.44	15
Rhizome3	Rhizome present	Invasive absent	AT	1.22	15
Rhizome3	Rhizome present	Invasive absent	AT	1.15	15
Rhizome3	Rhizome present	Invasive absent	AT	2.28	15
Rhizome3	Rhizome present	Invasive absent	CF	2.21	15
Rhizome3	Rhizome present	Invasive absent	CF	0.53	15
Rhizome3	Rhizome present	Invasive absent	CL	0.94	15
Rhizome3	Rhizome present	Invasive absent	CL	0.44	15
Rhizome3	Rhizome present	Invasive absent	CL	0.54	15
Rhizome3	Rhizome present	Invasive absent	GR	174.26	15
Rhizome3	Rhizome present	Invasive absent	MF	0.43	15
Rhizome3	Rhizome present	Invasive absent	MF	0.65	15
Rhizome3	Rhizome present	Invasive absent	MF	2.16	15
Rhizome3	Rhizome present	Invasive absent	MF	0.49	15
Rhizome3	Rhizome present	Invasive absent	MF	0.49	15
Rhizome4	Rhizome present	Invasive absent	AT	2.16	8
Rhizome4	Rhizome present	Invasive absent	AT	0.4	8
Rhizome4	Rhizome present	Invasive absent	AT	0.61	8
Rhizome4	Rhizome present	Invasive absent	AT	0.74	8
Rhizome4	Rhizome present	Invasive absent	AT	0.53	8
Rhizome4	Rhizome present	Invasive absent	CF	0.55	8
Rhizome4	Rhizome present	Invasive absent	CL	0.21	8
Rhizome4	Rhizome present	Invasive absent	CL	0.22	8
Rhizome4	Rhizome present	Invasive absent	GR	179.69	8
Rhizome5	Rhizome present	Invasive absent	AT	1.83	16
Rhizome5	Rhizome present	Invasive absent	AT	1.28	16
Rhizome5	Rhizome present	Invasive absent	AT	1.78	16
Rhizome5	Rhizome present	Invasive absent	AT	1.91	16
Rhizome5	Rhizome present	Invasive absent	CF	0.3	16
Rhizome5	Rhizome present	Invasive absent	CF	0.39	16
Rhizome5	Rhizome present	Invasive absent	CL	0.48	16
Rhizome5	Rhizome present	Invasive absent	CL	0.42	16
Rhizome5	Rhizome present	Invasive absent	GR	136.28	16
Rhizome5	Rhizome present	Invasive absent	MF	6.28	16
Both1	Rhizome present	Invasive present	AT	2.08	11
Both1	Rhizome present	Invasive present	CF	16.34	11
Both1	Rhizome present	Invasive present	CF	0.62	11
Both1	Rhizome present	Invasive present	CL	2.61	11
Both1	Rhizome present	Invasive present	CL	1.32	11
Both1	Rhizome present	Invasive present	CL	0.49	11
Both1	Rhizome present	Invasive present	CL	0.52	11
Both1	Rhizome present	Invasive present	GR	209.97	11
Both1	Rhizome present	Invasive present	LC	2.53	11
Both1	Rhizome present	Invasive present	MF	2.19	11
Both1	Rhizome present	Invasive present	MF	6.81	11
Both1	Rhizome present	Invasive present	MF	0.46	11
Both2	Rhizome present	Invasive present	AT	0.62	8
Both2	Rhizome present	Invasive present	AT	0.81	8
Both2	Rhizome present	Invasive present	AT	1.17	8
Both2	Rhizome present	Invasive present	AT	0.97	8
Both2	Rhizome present	Invasive present	CF	3.8	8
Both2	Rhizome present	Invasive present	GR	208.55	8
Both2	Rhizome present	Invasive present	LC	0.23	8
Both2	Rhizome present	Invasive present	LC	0.39	8
Both2	Rhizome present	Invasive present	LC	0.81	8
Both3	Rhizome present	Invasive present	AT	1.46	7
Both3	Rhizome present	Invasive present	AT	1.3	7
Both3	Rhizome present	Invasive present	AT	1.16	7
Both3	Rhizome present	Invasive present	GR	194.21	7
Both3	Rhizome present	Invasive present	LC	0.38	7
Both3	Rhizome present	Invasive present	MF	0.24	7
Both3	Rhizome present	Invasive present	MF	0.38	7
Both3	Rhizome present	Invasive present	MF	0.35	7
Rhizome5	Rhizome present	Invasive absent	AT	2.53	16
Rhizome5	Rhizome present	Invasive absent	AT	1.79	16
Rhizome5	Rhizome present	Invasive absent	CF	0.62	16
Rhizome5	Rhizome present	Invasive absent	CL	0.59	16
Rhizome5	Rhizome present	Invasive absent	CL	0.86	16
Rhizome5	Rhizome present	Invasive absent	CL	0.4	16
Rhizome5	Rhizome present	Invasive absent	GR	154.4	16
Both4	Rhizome present	Invasive present	AT	2.75	6
Both4	Rhizome present	Invasive present	AT	3.91	6
Both4	Rhizome present	Invasive present	AT	2.37	6
Both4	Rhizome present	Invasive present	CF	7.05	6
Both4	Rhizome present	Invasive present	CL	1.39	6
Both4	Rhizome present	Invasive present	GR	183.45	6
Both4	Rhizome present	Invasive present	MF	3.8	6
